# Supplementary material
Source: PubMed Central journal article supplement (PMC1323481)
Supplement: plntcell_tpc.105.037200_1.pdf [file plntcell_tpc.105.037200_1.pdf]

OsmADS58 1 -MHIYKEQEAEPSSTGLMPEPAPVASPGSGSGGSGSVGAEKIGSRGKIEIKRIENTTNRQVTFCKRRSG  
OsmADS3 1 MMNMMTDLSCGPSS--MTELTAAAAPAGSGSSAAVAAGSSEKMGREGKIEIKRIENTTNRQVTFCKRRNG

OsmADS58 70 LLKKAYELSVLCDAEVALVFSSRGRLYEYSNNSVKETIERYKKANSDTSNASTVAEINAQHYQQEAAKL  
OsmADS3 68 LLKKAYELSVLCDAEVALIVFSSRGRLYEYANNSVKSTVERYKKANSDTSNSGTVAEVNAQHYQQESSKL

OsmADS58 140 KQOITNLQNSN-RTLVDNITTMNHRELKOLEGRLDKGLGKIRARKNELLCAEIEYMQRRETELQNDNMY  
OsmADS3 138 RQOISSLQANASRTIVGDSINTMSLRDLKQVENRLEKGIKIRARKNELLYAEVEYMQKREVELQNDNMY

OsmADS58 209 LKSKVAESERGLQTVNMMGSASTSEYVQNMIH-YDPRNFLQFNIMHQPQYYPEQEDRKAFMSDER----  
OsmADS3 208 LRKVVENERGQQLNMMGAASTSEYDHMVNPNYDSRNFLQVNIHQPPQHYAHQLQPTTLQLGQQPAFN
