# Supplementary material
Source: PubMed Central journal article supplement (PMC1323481)
Supplement: plntcell_tpc.105.037200_2.pdf [file plntcell_tpc.105.037200_2.pdf]

|                       |   |                                                              |
|-----------------------|---|--------------------------------------------------------------|
| HvAG2                 | 1 | -----MVKESVSPGLG--SAGAAAEK                                   |
| WAG1                  | 1 | -----MQILNEQLAAPST-----GLMVKESASPGSGSGSPGGAAEK               |
| O <sub>s</sub> MADS58 | 1 | -----MHIYKEQEAEPSTGLMMPEPAPVASPGSGSGSGSVGAEKI                |
| ZAG1                  | 1 | -----MHIREEEATPSTVTGIMSTLTSAGQQKLEKIPSGGGGSASVAGSAAE         |
| ZMM2                  | 1 | -----MLNMMTDLSCGPSSKVKEQVAAAPTGGSD-----                      |
| ZMM23                 | 1 | LTSSFSSLSGSLPEERHYCHTTTTPPMLNMMTDLSCGPSSKAAKGGQPAATTGSG----- |
| O <sub>s</sub> MADS3  | 1 | -----MMNMMTDLSCGPSSMTELTAAAAPAGSGSSAAVAA                     |
| HvAG1                 | 1 | -----MMSMMADLSCGASGVTVNDHQLTAPAPEES--AV                      |
| WAG2                  | 1 | -----MSMMADLSCGASGVTVNDHQLAAPAPEDS--AA                       |
| FAR                   | 1 | -----MASLSDQSTEV                                             |
| pMADS3                | 1 | -----MEFQSDLTREI                                             |
| AG                    | 1 | -----FLQLLQISYFPENHFPKKNKTFPFVLLPPTAITAYQSELGGDS             |
| PLE                   | 1 | -----MEFPNQDSES-                                             |
| FBP6                  | 1 | -----MVFPNQEFESS                                             |
| SHP1                  | 1 | -----MEEGGSSHDA                                              |
| SHP2                  | 1 | -----MEGGASNEVA                                              |
| FBP7                  | 1 | -----                                                        |
| FBP11                 | 1 | -----                                                        |
| STK                   | 1 | -----                                                        |
| ZAG2                  | 1 | -----                                                        |
| ZMM1                  | 1 | -----                                                        |
| O <sub>s</sub> MADS13 | 1 | -----                                                        |
| O <sub>s</sub> MADS21 | 1 | -----MPLQVVFVSNLHSPPIDQLTARSSPLQIFRSV                        |
| ZMM25                 | 1 | -----                                                        |

|                       |    |                                                              |
|-----------------------|----|--------------------------------------------------------------|
| HvAG2                 | 20 | ----MGRGRIEKRIENTTNRQLTFCKRRNGLLKKAYELSVLCDAEVALVVFSSRGRLY   |
| WAG1                  | 37 | ----MGRGRIEKRIENTTNRQVTFCKRRNGLLKKAYELSVLCDAEVALIVFSSRGRLY   |
| O <sub>s</sub> MADS58 | 43 | G----SRGKIEIKRIENTTNRQVTFCKRRSGLLKKAYELSVLCDAEVALVVFSSRGRLY  |
| ZAG1                  | 48 | RNNGGRGKIEIKRIENTTNRQVTFCKRRNGLLKKAYELSVLCDAEVALIVFSSRGRLY   |
| ZMM2                  | 30 | --RQGGRGKIEIKRIENTTNRQVTFCKRRNGLLKKAYELSVLCDAEVALVVFSSRGRLY  |
| ZMM23                 | 55 | --GDRQGRGKIEIKRIENTTNRQVTFCKRRNGLLKKAYELSVLCDAEVALVVFSSRGRLY |
| O <sub>s</sub> MADS3  | 36 | GSSEKMGRGKIEIKRIENTTNRQVTFCKRRNGLLKKAYELSVLCDAEVALIVFSSRGRLY |
| HvAG1                 | 33 | AGSEKMGRGRIEKRIENTTNRQVTFCKRRNGLLKKAYELSVLCDAEVALVVFSSRGRLY  |
| WAG2                  | 32 | AGSEKMGRGRIEKRIENTTNRQVTFCKRRNGLLKKAYELSVLCDAEVALIVFSSRGRLY  |
| FAR                   | 12 | SPERKIGRGKIEIKRIENKTNQVTFCKRRNGLLKKAYELSVLCDAEVALVVFSSRGRLY  |
| pMADS3                | 12 | SPQRKLGRGKIEIKRIENTTNRQVTFCKRRNGLLKKAYELSVLCDAEVALIVFSSRGRLY |
| AG                    | 44 | SPLRKSGRGKIEIKRIENTTNRQVTFCKRRNGLLKKAYELSVLCDAEVALIVFSSRGRLY |
| PLE                   | 11 | --LRKNGRGKIEIKRIENITNRQVTFCKRRNGLLKKAYELSVLCDAEVALVVFSSRGRLY |
| FBP6                  | 12 | SSQRKSGRGKIEIKRIENTTNRQVTFCKRRNGLLKKAYELSVLCDAEVALIVFSSRGRLY |
| SHP1                  | 11 | ESSKKLGRGKIEIKRIENTTNRQVTFCKRRNGLLKKAYELSVLCDAEVALIVFSTRGRLY |
| SHP2                  | 11 | ESSKKIGRGKIEIKRIENTTNRQVTFCKRRNGLLKKAYELSVLCDAEVALIVFSTRGRLY |
| FBP7                  | 1  | ----MGRGKIEIKRIENNTNRQVTFCKRRNGLLKKAYELSVLCEAEIALIVFSTRGRVY  |
| FBP11                 | 1  | ----MGRGKIEIKRIENNTNRQVTFCKRRNGLLKKAYELSVLCEAEIALIVFSTRGRVY  |
| STK                   | 1  | ----MGRGKIEIKRIENSTNRQVTFCKRRNGLLKKAYELSVLCDAEVALIVFSTRGRLY  |
| ZAG2                  | 1  | ----MGRGRIEKRIENNTSRQVTFCKRRNGLLKKAYELSVLCDAEVALIVFSSRGRLY   |
| ZMM1                  | 1  | ----MGRGRIEKRIENNTSRQVTFCKRRNGLLKKAYELSVLCDAEVALVVFSSRGRLY   |
| O <sub>s</sub> MADS13 | 1  | ----MGRGRIEKRIENTTSRQVTFCKRRNGLLKKAYELSVLCDAEVALIVFSSRGRLY   |
| O <sub>s</sub> MADS21 | 33 | DRLINMGRGKIEIKRIENKTSRQVTFCKRRNGLLKKAYELAILCEAEIALIVFSSRGRLY |
| ZMM25                 | 1  | -----RNGLLKKAYELSVLCEAEIALIVFSTRGRLY                         |

|          |     |                                                                 |
|----------|-----|-----------------------------------------------------------------|
| HvAG2    | 75  | EYSNN-SVKATIERYKKATSDTSSAG--TVAEINAQHYQQESAKLRQQITTLQNSN-RTL    |
| WAG1     | 92  | EYSNN-SVKATIERYKKATSDTSSAG--TVAEINAQHYQQESAKLRQQITTLQNSN-RTL    |
| OsMADS58 | 92  | EYSNN-SVKETIERYKKANSDTSNAS--TVAEINAQHYQQEAAKLKQITNLQNSN-RTL     |
| ZAG1     | 108 | EYANN-SVKGTIERYKKATSDNSSAAG-TIAEVTIQHYKQESARLRQQIVNLQNSN-RAL    |
| ZMM2     | 88  | EYANN-SVKSTIERYKKANSDSSNSG--TVAEVNAQYQQEASSKLRQMIHSLQANTRNI     |
| ZMM23    | 113 | EYANN-SVKSTIERYKKANSDTSNAG--TVAEVNAQYQQEASSKLRQAIDSLQAN-RTI     |
| OsMADS3  | 96  | EYANN-SVKSTVERYKKANSDTSNAG--TVAEVNAQYQQEASSKLRQQISSLQANSRTI     |
| HvAG1    | 93  | EYSNN-SVKATIERYKKANSDTSNAG--TVAEVNAQYQQEASSKLRQQISSLQNSNSRSL    |
| WAG2     | 92  | EYSNN-SVKATIERYKKANSDTSNAG--TVAEVNAQYQQEASSKLRQQISSLQNSNSRSL    |
| FAR      | 72  | EYANN-SVKATIDRYKKASSDSSLNG--SISEANTQYQQEASKLRAQISNLQNQ-NRM      |
| pMADS3   | 72  | EYANN-SVKATIERYKKACSDSSNTG--SIAEANAQYQQEASKLRAQIGNLQNQ-RNF      |
| AG       | 104 | EYSNN-SVKGTIERYKKAISDNSNTG--SVAEINAQYQQESAKLRQQIISIQNSN-RQL     |
| PLE      | 69  | EYANN-SVRATIERYKKASADSSNSV--STSEANTQFYQQEANKLRRQIREIQTSN-RQM    |
| FBP6     | 72  | EYANN-SVRATIDRYKKHADSTSTG--SVSEANTQYQQEAAKLRRQIRDITQYN-RQI      |
| SHP1     | 71  | EYANN-SVRGTIERYKKACSDAVNPP--SVTEANTQYQQEASKLRRQIRDIQNSN-RHI     |
| SHP2     | 71  | EYANN-SVRGTIERYKKACSDAVNPP--TITEANTQYQQEASKLRRQIRDIQNLN-RHI     |
| FBP7     | 56  | EYSNN-NIRAIIDRYKKATVETSNAF--TTQELNAQFYQQESKLRQQIQLIQNSN-RHL     |
| FBP11    | 56  | EYANN-NIKGTIERYKKATAETSNAF--TTQELNAQFYQQESKLRQQIQLLQNTN-RHL     |
| STK      | 56  | EYANN-NIRSTIERYKKACSDSTNTS--TVQEINAAYYQQESAKLRQQIQTIQNSN-RNL    |
| ZAG2     | 56  | EYANN-SVKATVERYKKAHTVGSSSGPPLLEHNAQQFYQQESAKLRNQIQMLQNTN-RHL    |
| ZMM1     | 56  | EYANN-SVKATIERYKKAHAVGSSSGPPLLEHNAQQFYQQESVKLNRNQIQMLQNTN-RHL   |
| OsMADS13 | 56  | EYSNNNVKATIDRYKKAHACGSGAPLIEVNAQQYQQESAKLRHQIQMLQNTN-KHL        |
| OsMADS21 | 93  | EFSNVNSTRSTIERYKKASASTSGAP-VIDVNSHQFYQQEAAKMRHQIQTLQAN-RHL      |
| ZMM25    | 32  | EYS-SNSVRSTIERYKKASASTSGTAP-VTDVNSLQFYQQEAAKLRRQIQTLQNSN-RHL    |
|          |     |                                                                 |
| HvAG2    | 131 | IGDTMATMSHRDLKQLEGRLDKGLGKIRARKNELLSAEI EYMQRREMEELQNNNFYLREK   |
| WAG1     | 148 | IGDTMATMSHRDLKQLEGRLDKGLGKIRARKNELLSAEI EYMQRREMEELQNNNFYLREK   |
| OsMADS58 | 154 | VGDNITTMNHRELKQLEGRLDKGLGKIRARKNELLSAEI EYMQRRETEELQNDNMYLRSK   |
| ZAG1     | 165 | IGDSITTMHRELKQLEGRLDKGLGKIRARKNELLSAEI EYMQRRETEELQNDNMYLRSK    |
| ZMM2     | 145 | VGDSIHTMGLRDLKQMEGKLEKAIKIRARKNELLSAEI EYVDYMQKREMDLQTDNMYLRSK  |
| ZMM23    | 169 | VGDSIHTMGLRDLKQMEGKLEKAIKIRARKNELLSAEI EYVEYMQKREMDLQTDNMYLRSK  |
| OsMADS3  | 153 | VGDSINTMSLRDLKQVENRLEKGIKIRARKNELLSAEI EYVEYMQKREVELQNDNMYLRSK  |
| HvAG1    | 150 | VRDSVSTMTLRDLKQLEGRLEKGIKIRARKNELLSAEI EYVEYMQKREMEELHNDNIYLRSK |
| WAG2     | 149 | VRDSVSTMTLRDLKQLEGRLEKGIKIRARKNELLSAEI EYVEYMQKREMEELQNDNIYLRSK |
| FAR      | 128 | LGESLGALSLRELKNLESRVERGISRIRSKKNELLSAEI EYMQKRQEIDLHNNQYLRAK    |
| pMADS3   | 128 | LGESLAALNLRDLRNLEKGIKIRAKKNELLSAEI EYMQKREIDLHNNQYLRAK          |
| AG       | 160 | MGETIGSMSPKELRNLEGRLEKGIKIRSKKNELLSAEI EYMQKREVDLHNDNQILRAK     |
| PLE      | 125 | LGEGVSNMALKDLKSTEAKVEKAIKIRSKKNELLSAEI EYMQKRELELHNNMFLRAK      |
| FBP6     | 128 | VGEALSSLSRGLKNLEKLEKAIKIRVRSKKNELLSAEI ELMQKREIEMQNANMYLRAK     |
| SHP1     | 127 | VGESLGSNFKELKNLEGRLEKGIKIRVRSKKNELLSAEI EYMQKREMEELQNDNMYLRAK   |
| SHP2     | 127 | LGESLGSNFKELKNLESRLEKGIKIRVRSKKNELLSAEI EYMQKREIEMQNANMYLRSK    |
| FBP7     | 112 | VGEGLSSLNRELKQLENRLEKGIKIRSKKHEMILAESEDLQKREIQLQENAFRLRSK       |
| FBP11    | 112 | VGEGLSALNVRELKQLENRLEKGIKIRSKKHEMILAEENLQKREIQLQENAFRLRSK       |
| STK      | 112 | MGDSLSSLSVKELKQVENRLEKAIKIRSKKHELLLSAEI EYMQKREIEMQNANMYLRTK    |
| ZAG2     | 114 | VGDSVGNLSLRELKQLESRLEKGIKIRARKSELLAAEIN YMAKRETEELQNDHMTLRTK    |
| ZMM1     | 114 | VGDSVGNLSLRELKQLESRLEKGIKIRARKSELLAAEIN YMAKRETEELQNDHMTLRTK    |
| OsMADS13 | 115 | VGDNVSNLSLRELKQLESRLEKGIKIRARKNELLSAEI EYMQKREIEMQNANMYLRTK     |
| OsMADS21 | 151 | IGESIGNMTAKELKSLNLEKGIKIRSKKHELLLSAEI EYMQKREADLQNDNMYLRAK      |
| ZMM25    | 89  | MGESTGNMTAKELKGLERLEKGIKIRSKKHELLLSAEI EYMQKREADLHNNMFLRAK      |

|          |     |                                  |                        |                             |
|----------|-----|----------------------------------|------------------------|-----------------------------|
| HvAG2    | 190 | VAETERGQQTLNMMGAASTSNEYDQNM      | -----                  | QCDPRTFLQFNIMQQ-PQYY        |
| WAG1     | 207 | VSETERGQQTLNMMGAASTSNEYEQNM      | -----                  | HCDPRTFLQFNFMQQQPQYY        |
| OsMADS58 | 213 | VAESERG-LQTVNMMGSASTS-EYVQNM     | -----                  | HYDPRNFLQFNIMHQ-PQYY        |
| ZAG1     | 224 | VDENERA-QQTANMMGAPSTS-EYQQHGF    | TP-----                | YDPIRSFLQFNIVQQ-PQFY        |
| ZMM2     | 204 | IAESNETGQPAMHMTMGAPPTSEYDHMA     | -----                  | PFDSRNFLQVSMPPQHYSHL        |
| ZMM23    | 228 | IAENNETGQPPMNIG-LPSTSEYDHMAP     | -----                  | FVDSRNFLQVNMQQQPQHYS        |
| OsMADS3  | 212 | VVE-NERGQQPLNMMGAA-STSEYDHMVNN   | -----                  | PYDSRNFLQVNMQQQPQHYS        |
| HvAG1    | 209 | VSENER-GQQPMNMMASGTSSEYDHMVA     | -----                  | PYDSRNFLQVNMQQQQ-HY         |
| WAG2     | 208 | VSENER-GQQPVNMMASGSASSEYDHMVS    | -----                  | PYDSRNFLQANIMQQQQQHY        |
| FAR      | 188 | IAESERVGGQHMNLMGGSSGYEQLVETQ     | -----                  | PFDAARNYLQVNLQPNNDYP        |
| pMADS3   | 187 | IAETERSQ-QMNLMPGSSS-YDLVPPQQ     | -----                  | SFDAARNYLQVNLQTNNHYP        |
| AG       | 219 | IAENERNN-PSISLMPGSSNYEQLMPPPTQSQ | -----                  | PFDSRNIFYQVAALQPNHHY        |
| PLE      | 184 | IAEGERAQ-QQMNLMPGS-----          | DYQPMTSQ-----          | SYDVRNFLPMNLMENPQQQY        |
| FBP6     | 187 | IAEVERAT-QQMNLMHGGGSEYQQPMSSTSQ  | -----                  | PYDARNFLPVNLLLEPNP-HY       |
| SHP1     | 186 | IAEGARLNPDQQESSVIQGTTVYESGVSSHQS | -----                  | QHYNRNYIPVNLLEPNQFS         |
| SHP2     | 186 | ITERTGLQ-QQESSVIHQGTVYESGVSSHQS  | -----                  | GQYNRNYIAVNLLEPNQSS         |
| FBP7     | 171 | IAENERLQELSMMPAGQEYNAIQ          | -----                  | QYLARNMLQLNMMEG-VPS         |
| FBP11    | 171 | IAENERLQELSMMPATGQEYNAFNQ        | -----                  | QYFARMLQLNMM-EGGVPSY        |
| STK      | 171 | VAEVERYQHHHQMVGSEINAIE           | -----                  | ALASRNYFAHSIMTAGSGSG        |
| ZAG2     | 173 | IEEGEQQLQVTVARSVAAAAATNLELNPFL   | EMDTKCFFTGGPFATLDMKCF  | LPGLSQ                      |
| ZMM1     | 173 | IEEGEQQLQVTVARSAAMELQAAAAQQQ     | QNPFAVAAAQLDMKCF       | FLNLF                       |
| OsMADS13 | 174 | IAEEEQQLQVTVARSAAELQAAAAQQQ      | QNPFAVAAAQLDMKCF       | FLNLF                       |
| OsMADS21 | 210 | VAEAERAEHDDQAAEDDEMAPAPAVGG      | SSSGTELEALPATFDTREYQP  | PAPVSMRLG                   |
| ZMM25    | 148 | VAEAERALEQ-EAAEDQTMMPAAVRG       | -----                  | ATTELKALPASFDASGYQYQQHQHVAA |
|          |     |                                  |                        |                             |
| HvAG2    | 238 | TQQEDRKTLSNVER                   | -----                  |                             |
| WAG1     | 256 | SQQEDRKSLSNVR                    | -----                  |                             |
| OsMADS58 | 259 | PEQEDRKAFMSDER                   | -----                  |                             |
| ZAG1     | 272 | SQQEDRKDFNDQGG                   | -----                  |                             |
| ZMM2     | 252 | QPTTLQLG                         | -----                  |                             |
| ZMM23    | 276 | HLSAATNDPPTRMMLRIFGQQSMHASTQ     | -----                  |                             |
| OsMADS3  | 260 | HQLQPTTLQLGQQPAFN                | -----                  |                             |
| HvAG1    | 255 | SQQLQPTALQLGQQYFN                | -----                  |                             |
| WAG2     | 256 | SQQLQPTALQLGQQYFN                | -----                  |                             |
| FAR      | 237 | ---RQDQLPLQLV                    | -----                  |                             |
| pMADS3   | 233 | ---RQDQPPLQLV                    | -----                  |                             |
| AG       | 271 | SSAGRQDQALQLV                    | -----                  |                             |
| PLE      | 229 | S---RHDQALQLV                    | -----                  |                             |
| FBP6     | 237 | S---RQDQALQLV                    | -----                  |                             |
| SHP1     | 239 | G---QDQPPLQLV                    | -----                  |                             |
| SHP2     | 237 | N---QDQPPLQLV                    | -----                  |                             |
| FBP7     | 212 | YPLPSDKKSLDLE                    | -----                  |                             |
| FBP11    | 215 | DPLPAHDKKSLQLE                   | -----                  |                             |
| STK      | 215 | NGGSYSDDPKKILHLG                 | -----                  |                             |
| ZAG2     | 233 | MLEAQQRQMLATELNLG--YQLAPP        | GSDAANNPHHF----        |                             |
| ZMM1     | 231 | MLEAQQRQMLATELNLG--YQLAPP        | DTVANNPQQF-----        |                             |
| OsMADS13 | 234 | AVAAQRQQIIPTELNLGYHHHLAIP        | GATAADAPPPHF-----      |                             |
| OsMADS21 | 270 | AAAAAAQYSS-----                  | DHHQALHLGYFKVDSGKGLL-- |                             |
| ZMM25    | 203 | ASAASSQYAEQPQQQEYHHQALHL         | GYHVKIDSAADKGF         |                             |

Supplemental Figure 2 Alignment of C-class genes.
