# Supplementary material
Source: PubMed Central journal article supplement (PMC1323481)

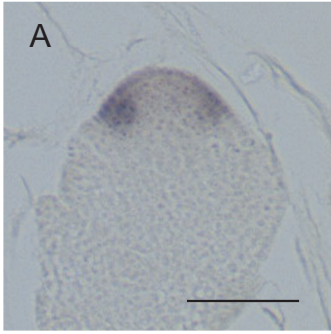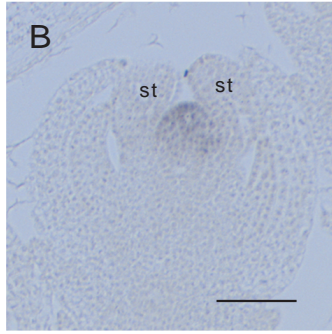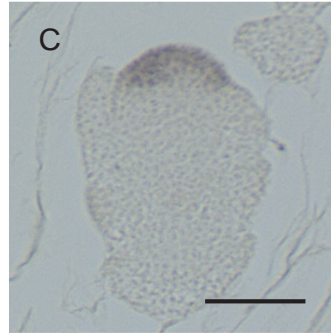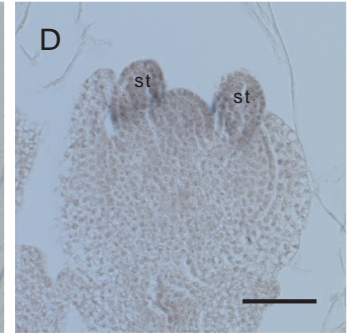

Supplement: plntcell_tpc.105.037200_3.pdf [file plntcell_tpc.105.037200_3.pdf]
